# Supplementary figures and images for: Impact of physiotherapy access on health-related quality of life following hip fracture: an observational study on 30 752 hip fractures from the Norwegian Hip Fracture Register 2014–2018
Source: HighWire-hosted journal article supplement (doi:10.1136/bmjopen-2024-086428), 2024-06-01

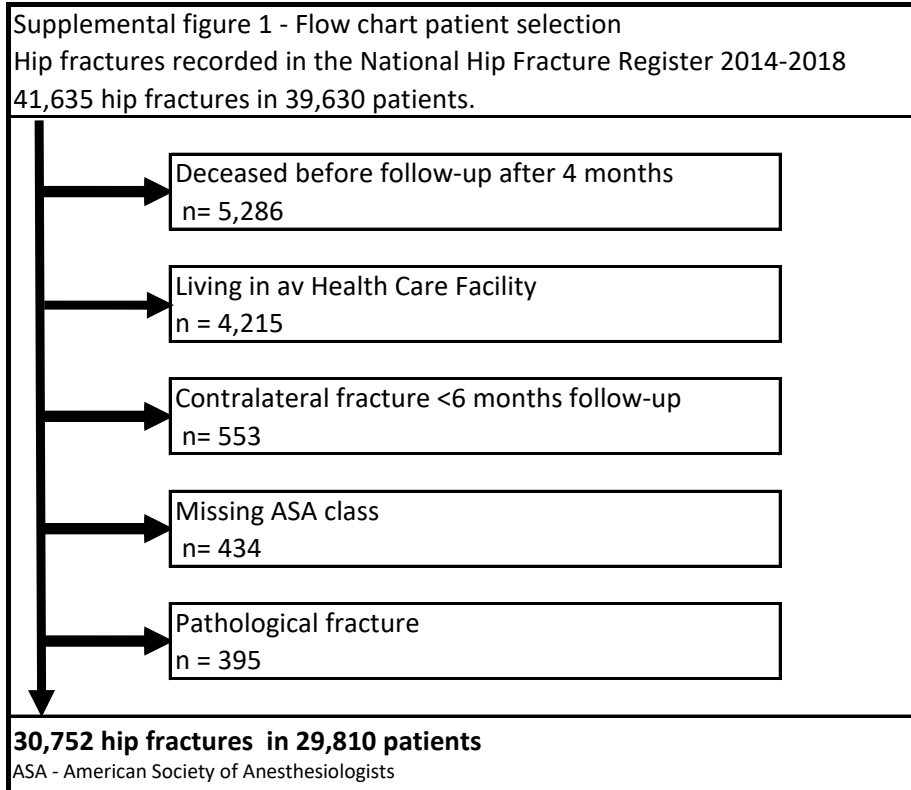

Supplement: bmjopen-2024-086428supp001_data_supplement.pdf [file bmjopen-2024-086428supp001_data_supplement.pdf]
